# Supplementary material for: A novel homeostatic loop of sorcin drives paclitaxel-resistance and malignant progression via Smad4/ZEB1/miR-142-5p in human ovarian cancer
Source: PubMed Central journal article supplement (PMC8321900; doi:10.1038/s41388-021-01891-6), 2021-06-23
Supplement: 41388_2021_1891_MOESM2_ESM.pdf [file 41388_2021_1891_MOESM2_ESM.pdf]

**A**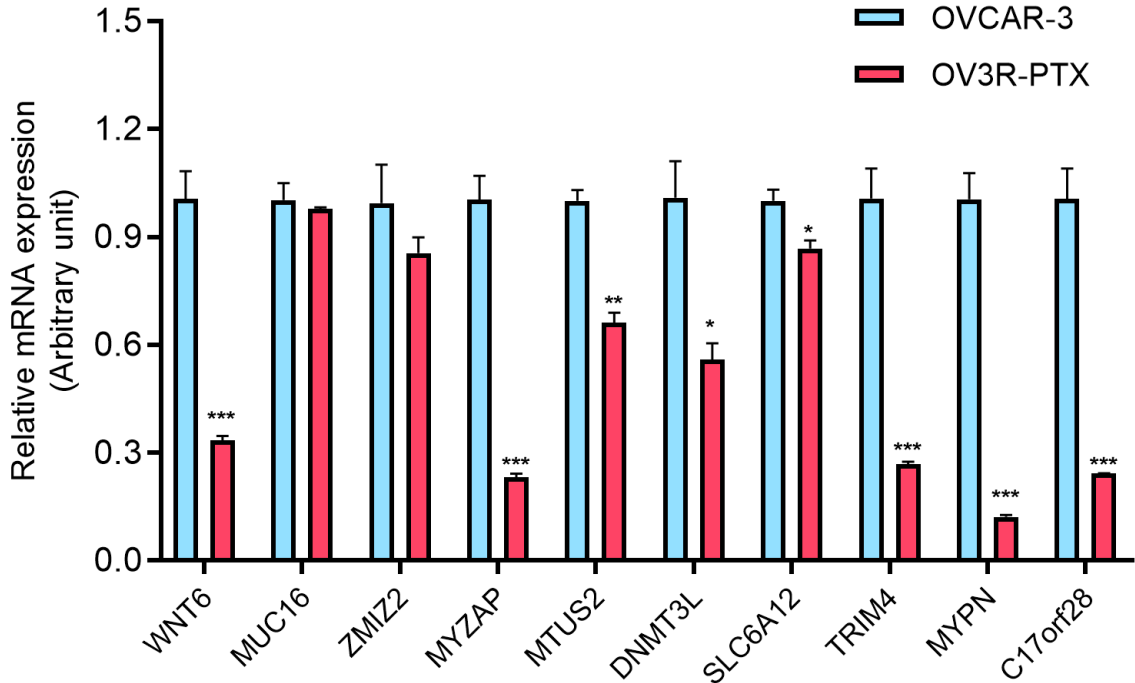**B**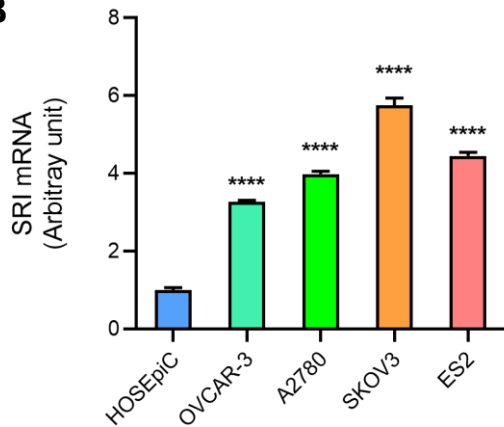**C**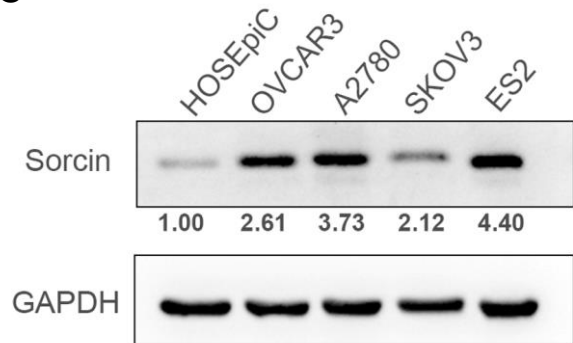**Supplementary Figure S1.**

Detection of top 10 downregulated mRNAs in PTX-resistant cells and SRI expression in human ovarian cells. **A**, Top 10 downregulated mRNAs in OV3R-PTX cells compared with OVCAR-3 cells detected by microarray were verified by qRT-PCR. **B**, SRI mRNA in normal ovarian surface epithelial cells (HOSEpiC) vs. four ovarian cancer cells by qRT-PCR. **C**, SRI protein expression in HOSEpiC vs. four ovarian cancer cells by Western blot.

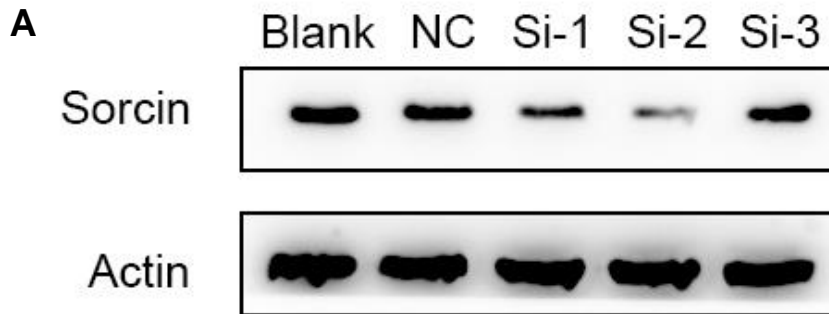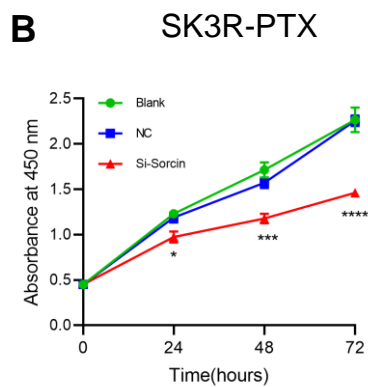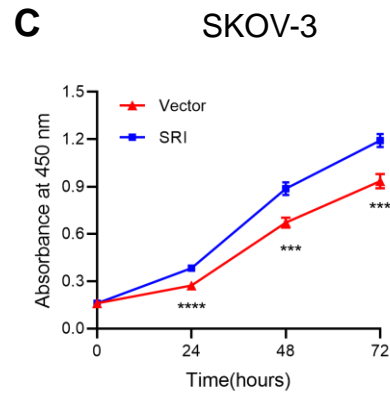

### Supplementary Figure S2.

Effect of SRI on cell proliferation. **A**, Examination of the efficacy of SRI-siRNA in OV3R-PTX cells by Western blot. three SRI-specific siRNAs (Si-1 to -3) were designed to silence SRI expression. **B**, Cell proliferation of SK3R-PTX after sorcin-siRNA (Si-2) transfection detected by the CCK8 assay. **C**, SKOV-3 cell proliferation after sorcin plasmid transfection detected by the CCK8 assay.

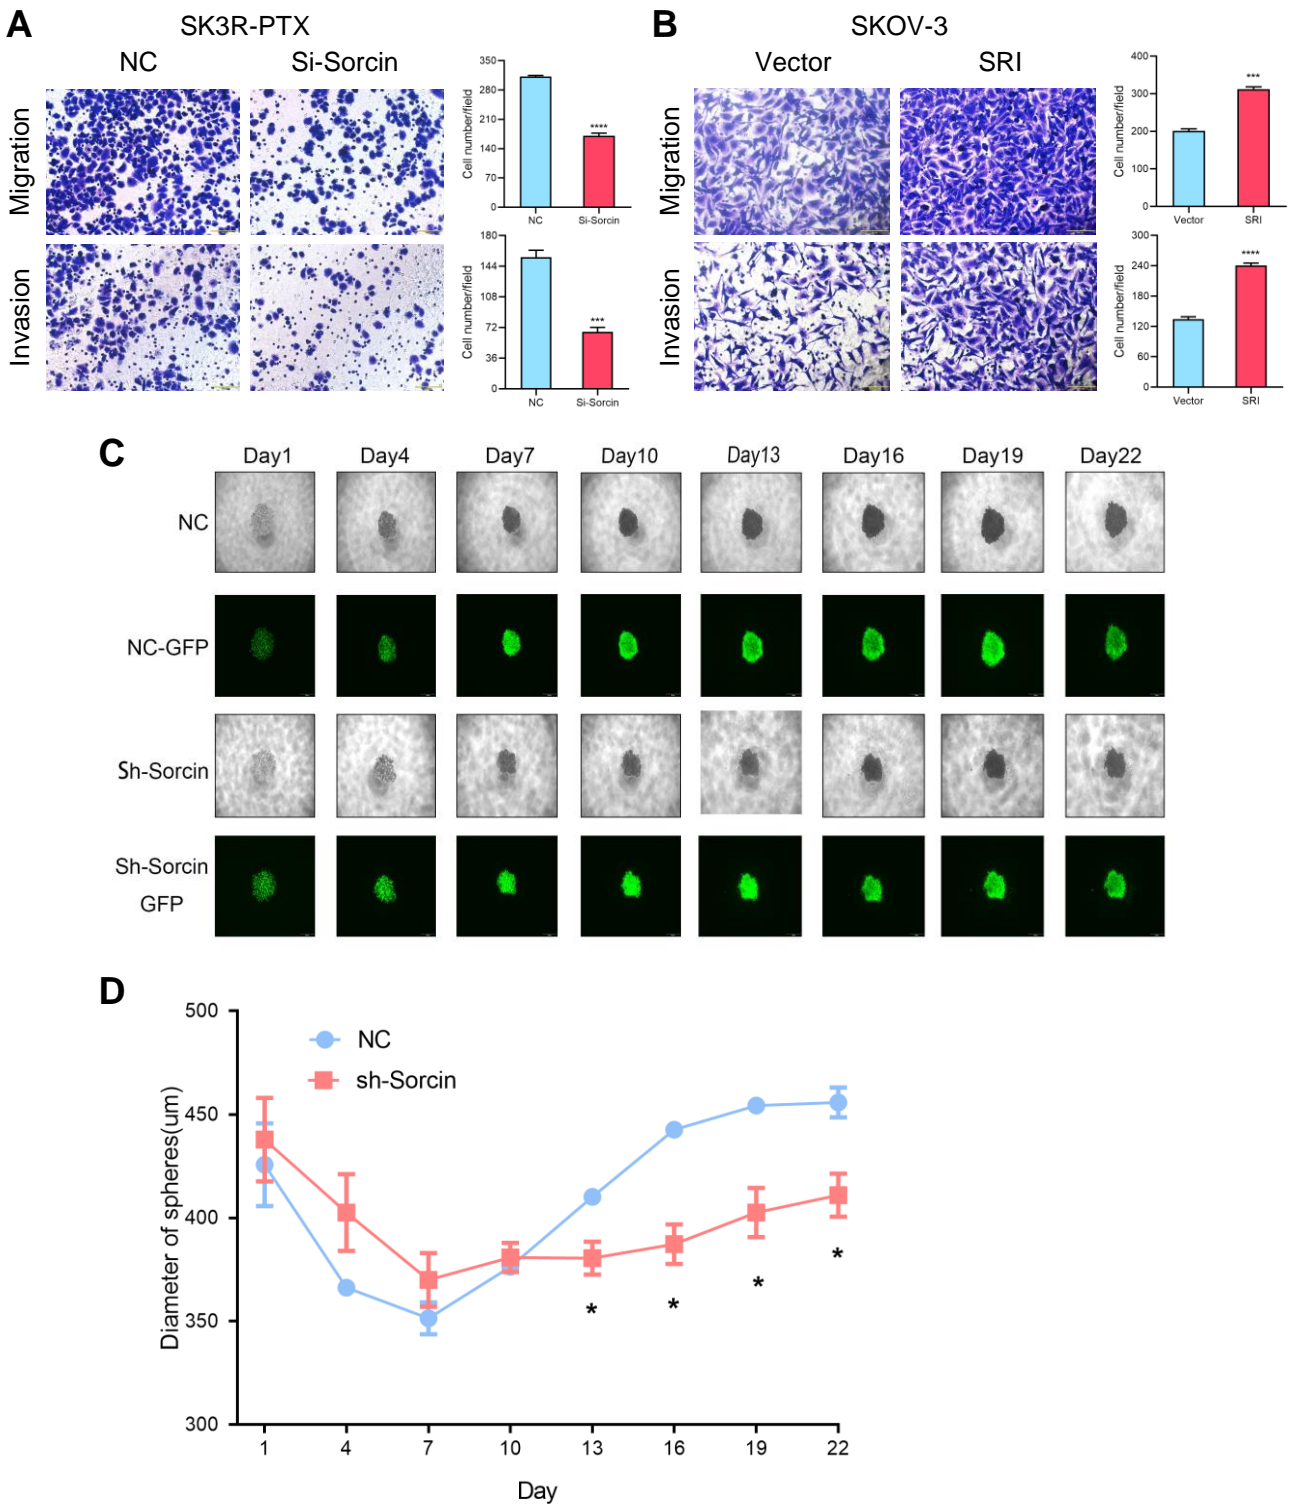

### Supplementary Figure S3

Effect of SRI on cell migration, invasion, and Tumor spheroid formation. **A**, Migration and invasion of SK3R-PTX cells after the knockdown of sorcin by siRNA for 48 h. **B**, Migration and invasion of SKOV-3 cell after the transfection of sorcin plasmid for 48 h. **C**, Tumor spheroid formation using a three-dimensional cell culture system after SRI-shRNA infection in OV3R-PTX cells. **D**, Measurement of sphere size. The knockdown of SRI decreased the size of a tumor spheroid in OV3R-PTX cells. Scale bar, 100  $\mu\text{m}$ .

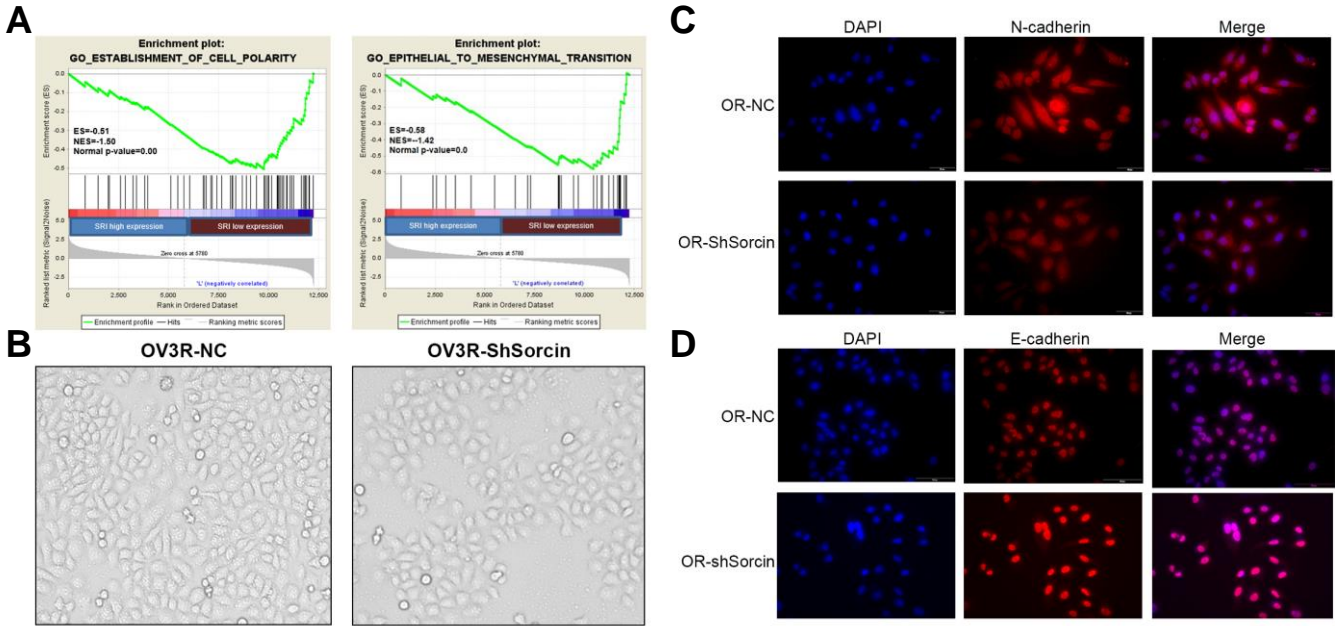

### Supplementary Figure S4.

Detection of epithelial-mesenchymal transition (EMT) in OV3R-PTX cells. **A**, GSEA analyses. GSEA revealed that Sorcin (SRI) participated in the establishment of cell polarity (left) and EMT (right). **B**, Phase-contrast imaging showed the morphology of control cells (OV3R-NC) and SRI-knockdown cells (OV3R-ShSorcin). **C**, Comparison of N-cadherin expression between OV3R-ShSorcin cells and negative control cells detected by immunofluorescence staining. **D**, Comparison of E-cadherin expression between OV3R-ShSorcin cells and negative control cells detected by immunofluorescence staining.



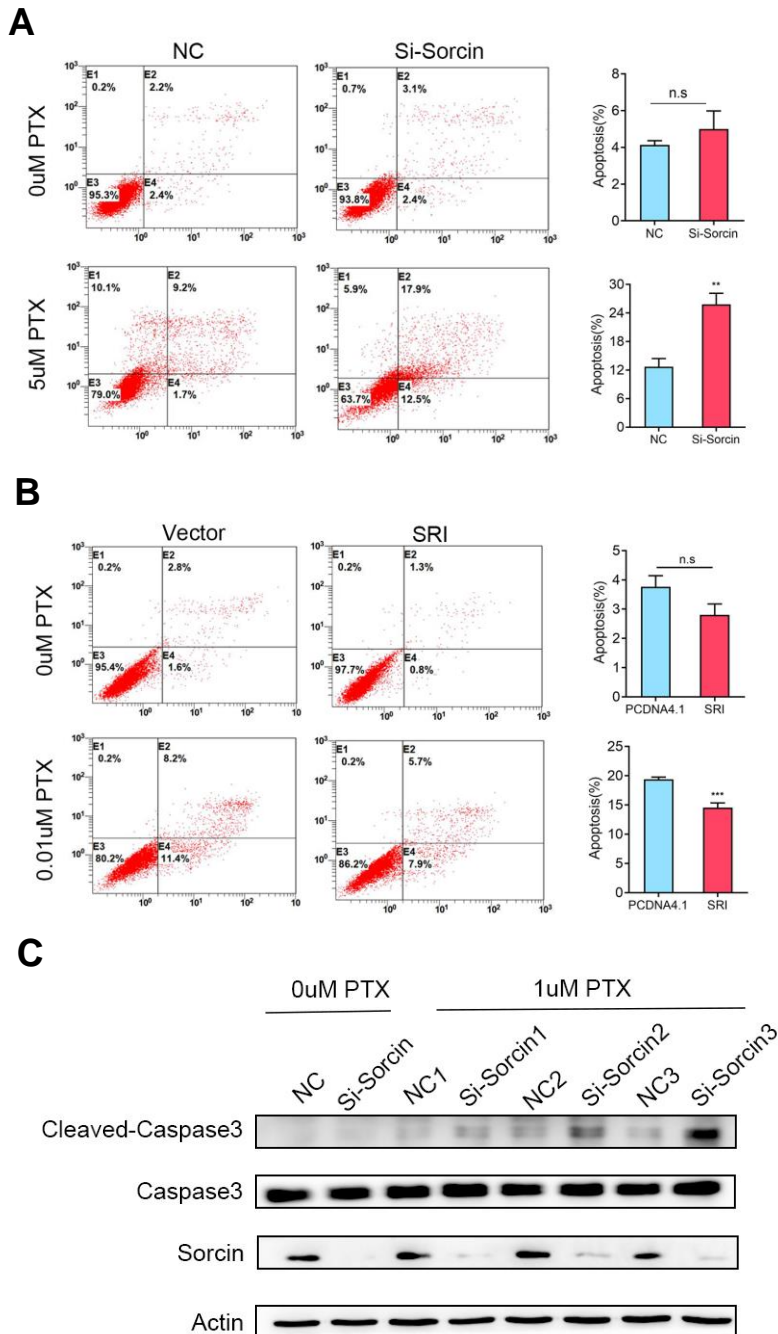

### Supplementary Figure S6.

Detection of apoptotic cells. **A**, OV3R-PTX cells were transfected with Sorcin-siRNA or negative control-siRNA (NC) in the presence or absence of 5  $\mu$ M paclitaxel (PTX). Apoptotic cells were detected by flow cytometry. **B**, OVCAR-3 cells were transfected with Sorcin-overexpressing plasmid (SRI) or control vector in the presence or absence of 0.01  $\mu$ M PTX. Apoptotic cells were detected by flow cytometry. n.s., not significant difference between two groups. \*\*,  $P < 0.01$ ; \*\*\*,  $P < 0.001$ . **C**, Detection of apoptotic protein by Western blot. OV3R-PTX cells were transfected with SRI-siRNA or negative control (NC) in the presence or absence of paclitaxel (PTX).





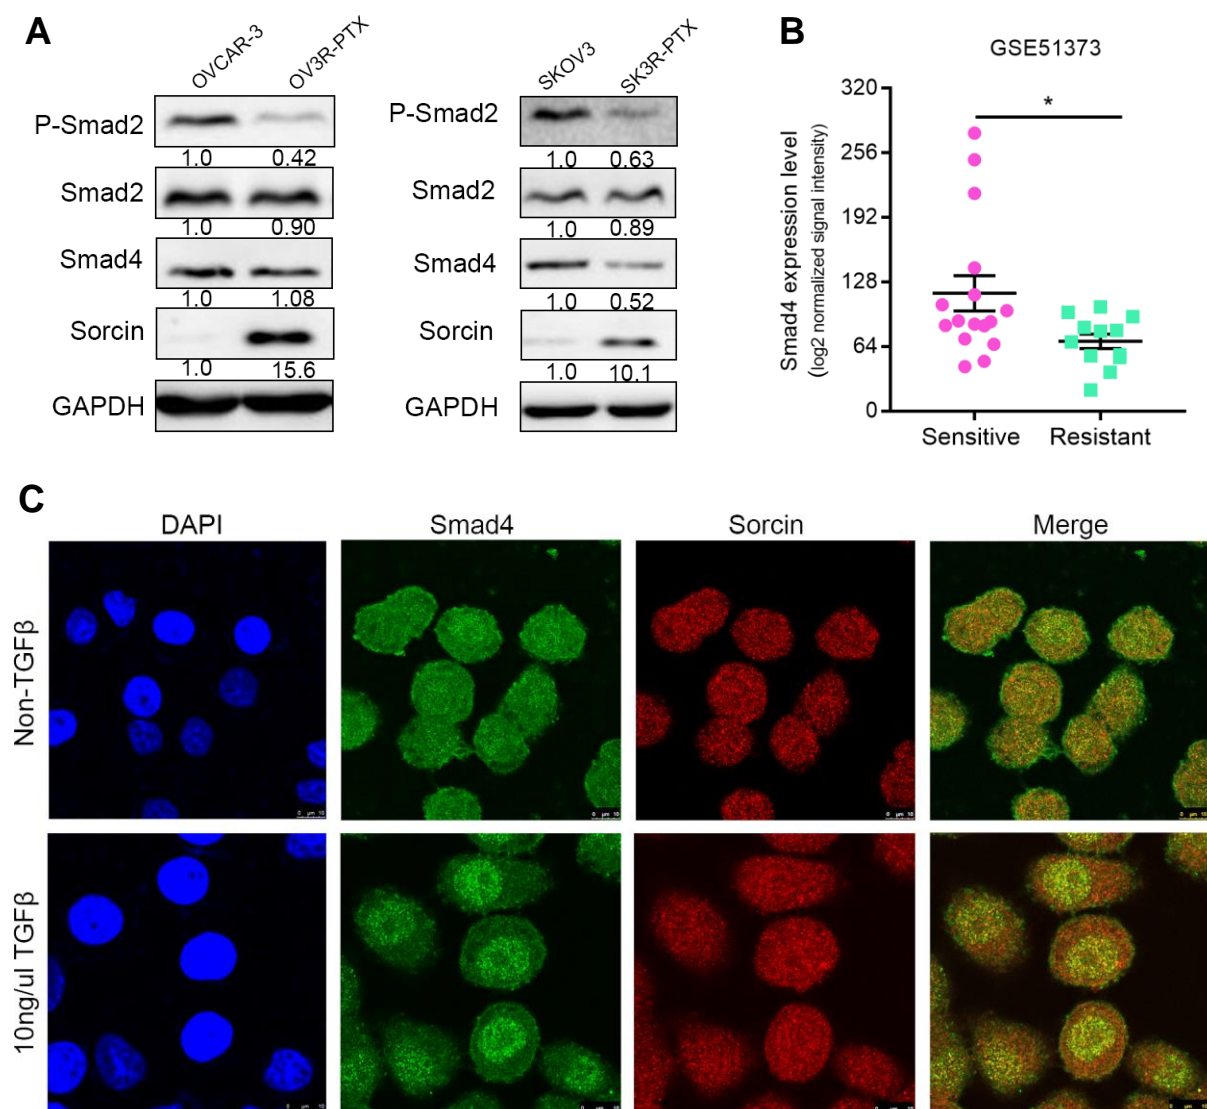

### Supplementary Figure S8.

Expression of Smad in chemo-sensitive and chemo-resistant ovarian cancer. **A**, Detection of specific proteins in ovarian cancer cells (OVCAR-3 and SKOV3) and PTX-resistant cells (OV3R-PTX and SK3R-PTX) by Western blot. **B**, Expression of Smad4 in chemo-resistant and sensitive ovarian cancers. Data were extracted from the GSE51373 dataset. **C**, Detection of Smad4 and Sorcin co-localization in SK3R-PTX cells in the presence or absence of TGF- $\beta$ 1 by confocal microscopy. Alexa Fluor 488 (green) or Alexa Fluor 594 (red) was used to detect Smad4 and Sorcin, respectively. The images of Smad4 and Sorcin were merged. The nucleus was stained with DAPI.
