# Supplementary material for: A novel homeostatic loop of sorcin drives paclitaxel-resistance and malignant progression via Smad4/ZEB1/miR-142-5p in human ovarian cancer
Source: PubMed Central journal article supplement (PMC8321900; doi:10.1038/s41388-021-01891-6), 2021-06-23
Supplement: 41388_2021_1891_MOESM3_ESM.pdf [file 41388_2021_1891_MOESM3_ESM.pdf]

**Supplementary Table S1.** The top 50 upregulated proteins detected by mass spectrometry in OV3R-PTX cells compared to OVCAR-3 cells

| <b>Protein</b> | <b>Full name</b>                                                     | <b>Accession Number</b> |
|----------------|----------------------------------------------------------------------|-------------------------|
| KDM6A_HUMAN    | Lysine-specific demethylase 6A                                       | O15550                  |
| MDR1_HUMAN     | ATP-dependent translocase ABCB1                                      | P08183                  |
| SORCN_HUMAN    | Sorcিন                                                               | P30626                  |
| TTYH3_HUMAN    | Protein tweety homolog 3                                             | Q9C0H2                  |
| TMM97_HUMAN    | Sigma intracellular receptor 2                                       | Q5BJF2                  |
| PRP18_HUMAN    | Pre-mRNA-splicing factor 18                                          | Q99633                  |
| CNOT8_HUMAN    | CCR4-NOT transcription complex subunit<br>8                          | Q9UFF9                  |
| FKBP5_HUMAN    | Peptidyl-prolyl cis-trans isomerase FKBP5                            | Q13451                  |
| AK1C2_HUMAN    | Aldo-keto reductase family 1 member C2                               | P52895                  |
| PHP14_HUMAN    | 14 kDa phosphohistidine phosphatase                                  | Q9NRX4                  |
| PURA1_HUMAN    | Adenylosuccinate synthetase isozyme 1                                | Q8N142                  |
| AN30B_HUMAN    | Ankyrin repeat domain-containing protein<br>30B                      | Q9BXX2                  |
| MTCH2_HUMAN    | Mitochondrial carrier homolog 2                                      | Q9Y6C9                  |
| UB2E1_HUMAN    | Ubiquitin-conjugating enzyme E2 E1                                   | P51965                  |
| EF1A2_HUMAN    | Elongation factor 1-alpha 2                                          | Q05639                  |
| NJMU_HUMAN     | Protein Njmu-R1                                                      | Q9HAS0                  |
| IDE_HUMAN      | Insulin-degrading enzyme                                             | P14735                  |
| MRGBP_HUMAN    | MRG/MORF4L-binding protein                                           | Q9NV56                  |
| H2B1O_HUMAN    | Histone H2B type 1-O                                                 | P23527                  |
| VP33A_HUMAN    | Vacuolar protein sorting-associated protein<br>33A                   | Q96AX1                  |
| NFKB2_HUMAN    | Nuclear factor NF-kappa-B p100 subunit                               | Q00653                  |
| PTPM1_HUMAN    | Phosphatidylglycerophosphatase and<br>protein-tyrosine phosphatase 1 | Q8WUK0                  |
| PARG_HUMAN     | Poly(ADP-ribose) glycohydrolase                                      | Q86W56                  |
| H2B1H_HUMAN    | Histone H2B type 1-H                                                 | Q93079                  |
| CT451_HUMAN    | Cancer/testis antigen family 45 member A1                            | Q5HYN5                  |
| ABCBB_HUMAN    | Bile salt export pump                                                | O95342                  |
| QSER1_HUMAN    | Glutamine and serine-rich protein 1                                  | Q2KHR3                  |
| PA24A_HUMAN    | Cytosolic phospholipase A2                                           | P47712                  |
| TPP1_HUMAN     | Tripeptidyl-peptidase 1                                              | O14773                  |
| SRSF3_HUMAN    | Serine/arginine-rich splicing factor 3                               | P84103                  |
| GPX1_HUMAN     | Glutathione peroxidase 1                                             | P07203                  |
| PTN23_HUMAN    | Tyrosine-protein phosphatase non-receptor<br>type 23                 | Q9H3S7                  |
| S10AB_HUMAN    | Protein S100-A11                                                     | P31949                  |

---

|             |                                                               |        |
|-------------|---------------------------------------------------------------|--------|
| AGAP3_HUMAN | ANK repeat and PH domain-containing<br>protein 3              | Q96P47 |
| LYAR_HUMAN  | Cell growth-regulating nucleolar protein                      | Q9NX58 |
| TBB5_HUMAN  | Tubulin beta chain                                            | P07437 |
| CK083_HUMAN | Ubiquinol-cytochrome-c reductase<br>complex assembly factor 3 | Q6UW78 |
| SIN3B_HUMAN | Paired amphipathic helix protein Sin3b                        | O75182 |
| NDRG1_HUMAN | Protein NDRG1                                                 | Q92597 |
| MLEC_HUMAN  | Malectin                                                      | Q14165 |
| SF3B5_HUMAN | Splicing factor 3B subunit 5                                  | Q9BWJ5 |
| GSTM3_HUMAN | Glutathione S-transferase Mu 3                                | P21266 |
| PRRC1_HUMAN | Protein PRRC1                                                 | Q96M27 |
| GLP3L_HUMAN | Golgi phosphoprotein 3-like                                   | Q9H4A5 |
| LEG1_HUMAN  | Galectin-1                                                    | P09382 |
| CSTF2_HUMAN | Cleavage stimulation factor subunit 2                         | P33240 |
| CYB5_HUMAN  | Cytochrome b5                                                 | P00167 |
| HPBP1_HUMAN | Hsp70-binding protein 1                                       | Q9NZL4 |
| STAT6_HUMAN | Signal transducer and activator of<br>transcription 6         | P42226 |
| GBB4_HUMAN  | Guanine nucleotide-binding protein subunit<br>beta-4          | Q9HAV0 |

---

**Supplementary Table S2.** Sequences of siRNA, shRNA, and oligonucleotides

| <b>Name</b>          | <b>Sequence (5' → 3')</b>                                           | <b>Target position</b> |
|----------------------|---------------------------------------------------------------------|------------------------|
| <b>SRI-siRNA</b>     |                                                                     |                        |
| Sense-1              | GCAUUGCUGGAGGAUACAATT                                               | nt 197-215             |
| Antisense-1          | UUGUAUCCUCCAGCAAUGCTT                                               |                        |
| Sense-2              | GCUGGAGACAACACUUUAUTT                                               | nt 323-341             |
| Antisense-2          | AUAAAGUAUUAUCUCCAGCTT                                               |                        |
| Sense-3              | CCUGACAACAAUGGGAUUUTT                                               | nt 396-414             |
| Antisense-3          | AAAUCCCAUUGUUGUCAGGTT                                               |                        |
| <b>NC-siRNA</b>      |                                                                     |                        |
| Sense                | UUCUCCGAACGUGUCACGUTT                                               | Scramble               |
| Antisense            | ACGUGACACGUUCGGAGAATT                                               |                        |
| <b>ZEB1-siRNA</b>    |                                                                     |                        |
| Sense                | GCUGAGAAGCCUGAGUCCUTT                                               | nt 1715-1733           |
| Antisense            | AGGACUCAGGCUUCUCAGCTT                                               |                        |
| <b>SMAD4-siRNA</b>   |                                                                     |                        |
| Sense                | GCUCCUAGACGAAGUACUUTT                                               | nt 2140-2158           |
| Antisense            | AAGUACUUCGUCUAGGAGCTT                                               |                        |
| <b>SRI-shRNA</b>     |                                                                     |                        |
| Sense                | gatccGCTGGAGACAACACTTTAT<br>TTCAAGAGAATAAAGTGTTGTCT<br>CCAGCTTTTTTg |                        |
| Antisense            | aattcAAAAAAGCTGGAGACAACA<br>CTTTATTCTCTTGAAATAAAGTG<br>TTGTCTCCAGCg |                        |
| <b>miRNA</b>         |                                                                     |                        |
| miR-Ctrl             | UUCUCCGAACGUGUCACGUTT                                               | Scramble               |
| miR-142-5p mimic     | CAUAAAGUAGAAAGCACUACU                                               |                        |
| miR-147a mimic       | GUGUGUGGAAAUGCUUCUGC                                                |                        |
| miR-142-5p inhibitor | AGUAGUGCUUUCUACUUUAUG                                               |                        |

Ctrl, control; NC, negative control; nt, nucleotide; shRNA, short hairpin RNA; siRNA, small interfering RNA. The target position in the SRI mRNA (GenBank Accession: NM\_003130), ZEB1 mRNA (GenBank Accession: NM\_030751.6), and SMAD4 mRNA (GenBank Accession: NM\_005359.6) sequences are shown.

**Supplementary Table S3.** Sequences of RT-PCR primers

| <b>Primer name</b>       | <b>Sequence (5' → 3')</b>                              | <b>Target position</b> |
|--------------------------|--------------------------------------------------------|------------------------|
| <b>SRI</b>               |                                                        |                        |
| Forward                  | GGACAAACTCAGGATCCGCTGTA                                | nt 97-119              |
| Reverse                  | GCCGGCAAGTCTCCAGGTTA                                   | nt 222-241             |
| <b>ZEB1</b>              |                                                        |                        |
| Forward                  | GATGATGAATGCGAGTCAGATGC                                | nt 344-366             |
| Reverse                  | ACAGCAGTGTCTTGTTGTTGT                                  | nt 409-429             |
| <b>GAPDH</b>             |                                                        |                        |
| Forward                  | GCACCGTCAAGGCTGAGAAC                                   | nt 249-268             |
| Reverse                  | TGGTGAAGACGCCAGTGGGA                                   | nt 386-368             |
| <b>RT primer</b>         |                                                        |                        |
| miR-142-5p               | GTCGTATCCAGTGCAGGGTCCGAG<br>GTATTCGCACTGGATACGACagtagt |                        |
| miR-147a                 | GTCGTATCCAGTGCAGGGTCCGAG<br>GTATTCGCACTGGATACGACgcagaa |                        |
| <b>Pri-miR-142</b>       |                                                        |                        |
| Forward                  | TGGAGCAGGAGTCAGGAGG                                    | nt 949-967             |
| Reverse                  | GCCGAGGAAGATGGTGG                                      | nt 1132-1148           |
| <b>U6</b>                |                                                        |                        |
| Forward                  | CTCGCTTCGGCAGCACACA                                    |                        |
| Reverse                  | AACGCTTCACGAATTTGCGT                                   |                        |
| <b>miR142-Chip-EBOX1</b> |                                                        |                        |
| Forward                  | CCTTCCCTCGAGCCTCTTTC                                   |                        |
| Reverse                  | GGCTAGGTGTTACGCTCTC                                    |                        |
| <b>miR142-Chip-EBOX2</b> |                                                        |                        |
| Forward                  | CTGAGTCAGTCCCAGGCTCTTG                                 |                        |
| Reverse                  | GGGAGGACAGACTGACAGGAAAC                                |                        |
| <b>miR142-Chip-ZBOX</b>  |                                                        |                        |
| Forward                  | GTGGCCTCGGGGTTATAAGC                                   |                        |
| Reverse                  | CAGTTGGGGCAGCAGTGAAG                                   |                        |

The positions in SRI mRNA (GenBank Accession: NM\_003130), ZEB1 mRNA (GenBank Accession: NM\_030751.6), GAPDH mRNA (GenBank Accession: NM\_001256799), and Pri-miR-142 (GenBank Accession: LC194526.1) sequences are shown. nt, nucleotide.

**Supplementary Table S4.** List of antibodies

| <b>Antibody</b> | <b>Source</b> | <b>Dilution</b> | <b>Company (Catalogy #)</b> | <b>Application</b> |
|-----------------|---------------|-----------------|-----------------------------|--------------------|
| SRI             | Rabbit pAb    | 1:300-2000      | abcam (ab71983)             | WB, IF, IHC        |
| SRI             | Rabbit pAb    | 3 µg            | Proteintech (16471-1-AP)    | IP                 |
| Claudin-1       | Rabbit mAb    | 1:1000          | CST (13255S)                | WB                 |
| N-cadherin      | Rabbit pAb    | 1:200-1000      | Immunoway (YT2988)          | WB, IF             |
| E-cadherin      | Mouse mAb     | 1:200-1000      | CST (14472S)                | WB, IF             |
| ZO-1            | Rabbit pAb    | 1:1000          | Proteintech (21773-1-AP)    | WB                 |
| PARP            | Rabbit mAb    | 1:3000          | CST (9532S)                 | WB                 |
| Caspase3        | Rabbit IgG    | 1:1000          | CST (9662)                  | WB                 |
| ZEB1            | Rabbit mAb    | 1:1000          | CST (3396)                  | WB, Chip           |
| Smad2           | Rabbit mAb    | 1:2000          | CST (5339S)                 | WB                 |
| P-Smad2         | Rabbit mAb    | 1:2000          | CST (3108)                  | WB                 |
| Smad4           | Rabbit mAb    | 1:1000          | CST (46535)                 | WB, IF             |
| Smad4           | Mouse mAb     | 2 µg            | Santa Cruz (sc-7966)        | IP                 |
| CD44            | Mouse mAb     | 1:500-5000      | CST (3570)                  | WB, IF             |
| CD133           | Rabbit mAb    | 1:1000          | CST (64326)                 | WB                 |
| SOX2            | Rabbit mAb    | 1:1000          | CST (3579)                  | WB                 |
| Cyclin B1       | Mouse mAb     | 1:2000          | CST (4135S)                 | WB                 |
| Cyclin D1       | Rabbit mAb    | 1:1000          | CST (2978S)                 | WB                 |
| Cyclin E1       | Mouse mAb     | 1:1000          | CST (4129)                  | WB                 |
| GAPDH           | Mouse mAb     | 1:5000          | Proteintech (60004-1-IG)    | WB                 |
| β-actin         | Mouse mAb     | 1:5000          | Proteintech (66009-1-IG)    | WB                 |
| Lamin B1        | Rabbit pAb    | 1:2000          | Proteintech (12987-1-AP)    | WB                 |
| Alexa-Fluor 488 | Mouse IgG     | 1:200           | CST (4408)                  | IF                 |
| Alexa-Fluor 594 | Rabbit IgG    | 1:200           | CST (8889)                  | IF                 |

Chip, Chromatin immunoprecipitation; CST, Cell Signaling Technology, Inc.; IF,

Immunofluorescence; IHC, Immunohistochemical staining; IP, Immunoprecipitation;

mAb, monoclonal antibody; pAb, polyclonal antibody; WB, Western blot.
